# Supplementary material
Source: PubMed Central journal article supplement (PMC7572838)
Supplement: NIHMS1629449-supplement-Supplementary_figures.pdf [file NIHMS1629449-supplement-Supplementary_figures.pdf]

# Supporting Information for

## Cancer immunotherapy *via* targeting cancer stem cells using vaccine nanodiscs

Alireza Hassani Najafabadi<sup>1,2,#</sup>, Jing Zhang<sup>3,4,#</sup>, Marisa E. Aikins<sup>1,2</sup>, Zeynab Izadi Najaf Abadi<sup>1,2</sup>, Fei Liao<sup>3,5</sup>, You Qin<sup>3,6</sup>, Emeka. B. Okeke<sup>1,2</sup>, Lindsay M. Scheetz<sup>1,2</sup>, Juttaek Nam<sup>1,2</sup>, Yao Xu<sup>1,2</sup>, David Adams<sup>7</sup>, Patrick Lester<sup>8</sup>, Taryn Hetrick<sup>8</sup>, Anna Schwendeman<sup>1,2</sup>, Max S. Wicha<sup>3</sup>, Alfred E. Chang<sup>3</sup>, Qiao Li<sup>\*,3</sup>, and James J. Moon<sup>\*,1,2,9</sup>

<sup>1</sup> Department of Pharmaceutical Sciences, University of Michigan, Ann Arbor, MI 48109, USA.

<sup>2</sup> Biointerfaces Institute, University of Michigan, Ann Arbor, MI 48109, USA.

<sup>3</sup> Department of Surgery, University of Michigan, Ann Arbor, MI 48109, USA.

<sup>4</sup> Department of Medical Oncology, Hubei Cancer Hospital, Tongji Medical College, Huazhong University of Science and Technology, Wuhan, Hubei, 430079, China.

<sup>5</sup> Gastroenterology Department, Renmin Hospital of Wuhan University, Wuhan, Hubei, 430060, China.

<sup>6</sup> Cancer Center, Union Hospital, Tongji Medical College, Huazhong University of Science and Technology, Wuhan, Hubei, 430022, China.

<sup>7</sup> Biomedical Research Core Facilities, University of Michigan, Ann Arbor, MI 48109, USA.

<sup>8</sup> Unit of Laboratory Animal Medicine, University of Michigan, Ann Arbor, MI 48109, USA.

<sup>9</sup> Department of Biomedical Engineering, University of Michigan, Ann Arbor, MI 48109, USA.

# Authors contributed equally.

\* Correspondence should be addressed to James J. Moon ([moonjj@med.umich.edu](mailto:moonjj@med.umich.edu)) or Qiao Li ([qiaoli@med.umich.edu](mailto:qiaoli@med.umich.edu)).

**Keywords:** Cancer stem cells, cancer vaccine, breast cancer, melanoma, aldehyde dehydrogenase.

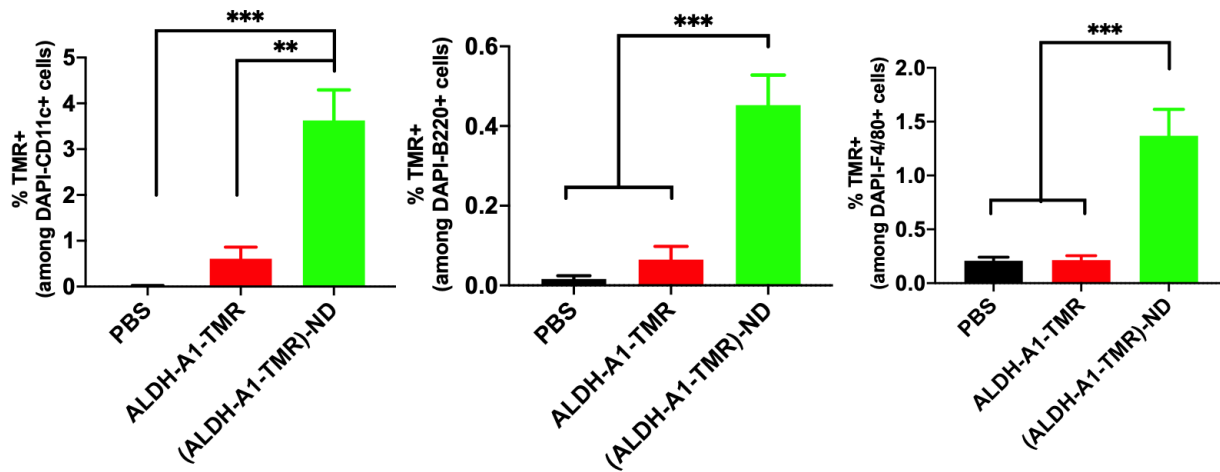

**Figure S1. ND is internalized by APCs in draining lymph nodes.** C57BL/6 mice were administered s.c. with 15.5 nmol TMR-tagged ALDH-A1 peptides as a soluble or ND form. After 24 h, TMR taken up by APCs in dLNs was quantified by flow cytometry analysis. The data show mean  $\pm$  SEM. Statistical significance was calculated by one-way ANOVA, followed by the Tukey's multiple comparisons post-test. \*\*  $p < 0.01$ , \*\*\*  $p < 0.001$ , and \*\*\*\*  $p < 0.0001$ .

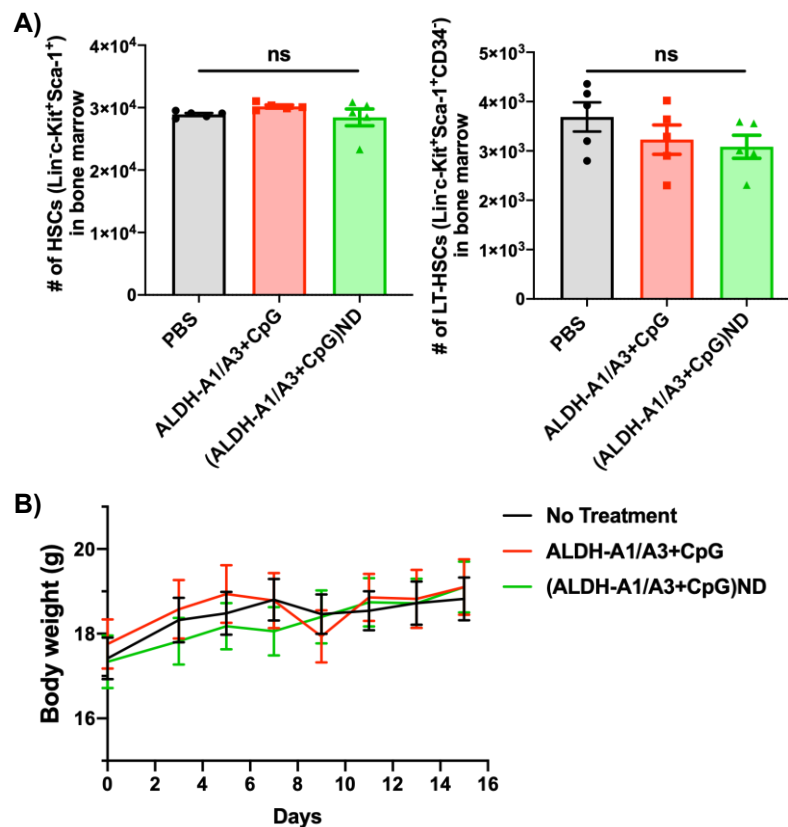

**Figure S2. Effects of ALDH vaccination on hematopoietic stem cells and animal body weight.** C57BL/6 mice were immunized with (ALDH-A1/A3-CpG)-ND or a soluble mixture of ALDH-A1/A3 and CpG (15.5 nmol/dose each Ag peptide and 15  $\mu$ g/dose CpG) on days 0 and 7. Shown are the **A)** numbers of hematopoietic stem cells (HSC, Lin<sup>-</sup>c-Kit<sup>+</sup>Sca-1<sup>+</sup>) and long-term HSCs (LT-HSC, Lin<sup>-</sup>c-Kit<sup>+</sup>Sca-1<sup>+</sup>CD34<sup>+</sup>) in bone marrow on day 15 and **B)** changes in animal body weight over time. The data show mean  $\pm$  SEM. Statistical significance was calculated by A) one-way ANOVA, or B) two-way ANOVA, followed by the Tukey's multiple comparisons post-test. ns = not statistically significant.

|                                         | No Treatment | ALDH-A1/A3+CpG | (ALDH-A1/A3+CpG) ND | Normal Range |
|-----------------------------------------|--------------|----------------|---------------------|--------------|
| <b>Creatinine (CREA, mg/dl)</b>         | 0.4 ± 0.01   | 0.4 ± 0.1      | 0.4 ± 0.03          | 0.09 - 0.4   |
| <b>Glucose (GLUC, mg/dl)</b>            | 247.6 ± 34.9 | 298.6 ± 33.7   | 241.2 ± 30.0        | 79.4 - 354.7 |
| <b>Albumin (ALB, g/dl)</b>              | 3.4 ± 0.1    | 3.0 ± 0.16     | 3.3 ± 0.1           | 2.7 - 4.2    |
| <b>TRPO, g/dl</b>                       | 5.0 ± 0.2    | 5.6 ± 0.2      | 5.5 ± 0.2           | 4.6 - 7.2    |
| <b>Calcium arsenazo (CALA, mg/dl)</b>   | 9.8 ± 0.2    | 8.9 ± 0.4      | 9.8 ± 0.6           | 9.0 - 12.4   |
| <b>Alanine transaminase (ALT, U/L)</b>  | 47.4 ± 7     | 71.4 ± 37.1    | 47.4 ± 6.4          | 24.3 - 115.3 |
| <b>Total bilirubin (TBIL, mg/dl)</b>    | 0.3 ± 0.1    | 0.3 ± 0.09     | 0.2 ± 0.1           | 0.1 - 0.6    |
| <b>Blood urea nitrogen (BUN, mg/dl)</b> | 31.6 ± 5.7   | 39.2 ± 4.7     | 32.4 ± 4.4          | 5.2 - 30.7   |
| <b>Alkaline phosphatase (ALP, U/L)</b>  | 190.0 ± 20.0 | 158.6 ± 13.2   | 164.4 ± 15.7        | 65.5 - 364.2 |

**Table S1.** C57BL/6 mice were immunized as in **Figure S2**, and serum biochemical markers were quantified on day 15.

|                                                               | No Treatment  | ALDH-A1/A3+CpG | (ALDH-A1/A3+CpG)ND | Normal Range |
|---------------------------------------------------------------|---------------|----------------|--------------------|--------------|
| <b>White blood cells (WBC, K/uL)</b>                          | 7.6 ± 1.9     | 10.6 ± 1.1     | 6.9 ± 1.2          | 1.8 - 10.7   |
| <b>Neutrophils (NE, K/uL)</b>                                 | 0.9 ± 0.3     | 1.1 ± 0.2      | 1.3 ± 0.3          | 0.1 - 2.4    |
| <b>Lymphocytes (LY, K/uL)</b>                                 | 6.5 ± 1.8     | 5.7 ± 1.0      | 9.1 ± 1.0          | 0.9 - 9.3    |
| <b>Monocytes (MO, K/uL)</b>                                   | 0.1 ± 0.04    | 0.1 ± 0.06     | 0.2 ± 0.1          | 0 - 0.4      |
| <b>Eosinophil (EO, K/uL)</b>                                  | 0.01 ± 0.008  | 0.008 ± 0.01   | 0.006 ± 0.005      | 0 - 0.2      |
| <b>Basophil (BA, K/uL)</b>                                    | 0.004 ± 0.009 | 0 ± 0          | 0 ± 0              | 0 - 0.2      |
| <b>Neutrophils (NE, %)</b>                                    | 12.1 ± 1.8    | 15.6 ± 2.3     | 12.3 ± 2.6         | 6.6 - 38.9   |
| <b>Lymphocytes (LY, %)</b>                                    | 85.6 ± 2.1    | 82.6 ± 2.0     | 85.5 ± 1.9         | 55.8 - 91.6  |
| <b>Monocytes (MO, %)</b>                                      | 2.0 ± 0.9     | 1.7 ± 0.7      | 2.1 ± 1.1          | 1.10 - 7.5   |
| <b>Eosinophil (EO, %)</b>                                     | 0.2 ± 0.1     | 0.1 ± 0.1      | 0.05 ± 0.03        | 0.0 - 3.9    |
| <b>Basophil (BA, %)</b>                                       | 0.08 ± 0.1    | 0.02 ± 0.03    | 0.03 ± 0.02        | 0.0 - 2.0    |
| <b>Red blood cells (RBC, M/uL)</b>                            | 9.4 ± 0.5     | 8.1 ± 3.4      | 9.1 ± 0.4          | 6.36 - 9.42  |
| <b>Hemoglobin (HB, g/dL)</b>                                  | 13.4 ± 0.8    | 11.5 ± 4.7     | 13.3 ± 0.4         | 11.0 - 15.1  |
| <b>Hematocrit (HCT, %)</b>                                    | 40.9 ± 2.5    | 42.4 ± 1.5     | 40.2 ± 1.2         | 35.1 - 45.4  |
| <b>Mean Corpuscular Volume (MCV, fL)</b>                      | 43.4 ± 0.4    | 43.3 ± 0.4     | 44.2 ± 1.4         | 45.4 - 60.3  |
| <b>Mean corpuscular hemoglobin (MCH, Pg)</b>                  | 14.2 ± 0.2    | 14.2 ± 0.3     | 14.7 ± 0.5         | 14.1 - 19.3  |
| <b>Mean corpuscular hemoglobin concentration (MCHC, g/dL)</b> | 32.8 ± 0.5    | 32.7 ± 0.9     | 33.1 ± 0.7         | 30.2 - 34.2  |
| <b>Red cell distribution (RDW, %)</b>                         | 15.9 ± 0.5    | 17.7 ± 0.4     | 18.8 ± 1.7         | 12.4 - 27.0  |
| <b>Platelets (PLT, K/uL)</b>                                  | 714.4 ± 69.0  | 923.8 ± 53.5   | 716.4 ± 130.0      | 592 - 2972   |
| <b>Mean platelet volume (MPV, fL)</b>                         | 4.5 ± 0.1     | 4.4 ± 0.0      | 4.8 ± 0.1          | 5.0 - 20     |

**Table S2.** C57BL/6 mice were immunized as in **Figure S2**, and the complete blood counts were quantified on day 15.
